# Supplementary material
Source: PubMed Central journal article supplement (PMC4556282)
Supplement: NIHMS697393-supplement-Supplementary_Tables.pdf [file NIHMS697393-supplement-Supplementary_Tables.pdf]

**Supplementary Materials for:**

**Plasma ApoC-III Levels, Triglycerides, and Coronary Artery  
Calcification in Type 2 Diabetics**

**Correspondence:**

Muredach P. Reilly, MB, MS, FAHA

[muredach@mail.med.upenn.edu](mailto:muredach@mail.med.upenn.edu)

Daniel J. Rader, MD

[rader@mail.med.upenn.edu](mailto:rader@mail.med.upenn.edu)

**Supplementary Table I: Baseline Characteristics of Study Cohort Stratified by Ethnicity**

|                                  | <b>Caucasian (N= 867)</b> | <b>African American (N=483)</b> | <b>Other (N= 72)</b> |
|----------------------------------|---------------------------|---------------------------------|----------------------|
| <b>Age (years)</b>               | 60 (54-66)*               | 58 (52-65)                      | 57(52-63)            |
| <b>Women (%)</b>                 | 30.1                      | 47.8                            | 36.7                 |
| <b>Metabolic syndrome (%)</b>    | 80.4                      | 75.5                            | 73.5                 |
| <b>Hypertension (%)</b>          | 61.6                      | 72.5                            | 49.1                 |
| <b>Current tobacco use (%)</b>   | 48.7                      | 48.1                            | 42.7                 |
| <b>BMI (kg/m<sup>2</sup>)</b>    | 32 (28.4-36)              | 32.3 (28.5-36.8)                | 30.4 (26.4-34.2)     |
| <b>HbA1c</b>                     | 6.6 (6.1-7.4)             | 6.9 (6.2-8.1)                   | 6.9(6.4-7.9)         |
| <b>Total Cholesterol(mg/dl)</b>  | 168 (148-195)             | 174 (152-200)                   | 176.5 (150-204.5)    |
| <b>Triglycerides (mg/dl)</b>     | 132 (92-191)              | 96 (71- 128)                    | 121 (87-162.5)       |
| <b>HDL-C (mg/dl)</b>             | 44 (37-52)                | 49 (40-59)                      | 42 (37-51.5)         |
| <b>LDL-C (mg/dl)</b>             | 92 (76-114)               | 100 (81-122)                    | 102 (78-119.5)       |
| <b>ApoC-III (mg/dl)</b>          | 12.2 (9.1-16.4)           | 9.3 (6.3-13.3)                  | 11.8 (9.3-16)        |
| <b>ApoA-I (mg/dl)</b>            | 128 (115-142)             | 134 (120-150.5)                 | 126 (112-141)        |
| <b>ApoA-II (mg/dl)</b>           | 33 (30-37)                | 34 (31-38)                      | 33 (31- 38)          |
| <b>ApoB (mg/dl)</b>              | 81 (70-94)                | 81 (68-95)                      | 82 (69-99)           |
| <b>Lp(a) (mg/dl)</b>             | 12 (6-31)                 | 47 (22-81.5)                    | 17.5 (7-37)          |
| <b>ApoE (mg/dl)</b>              | 3.8 (3.1-4.4)             | 4.1 (3.4-4.9)                   | 3.9 (3.2-4.7)        |
| <b>Leptin (ng/ml)</b>            | 13.1 (7.3-22.8)           | 16.6 (8.3-32.2)                 | 9.7 (5.6-23.1)       |
| <b>Insulin (iu/ml)</b>           | 15 (10.6-21.6)            | 15.3 (10.4-22.1)                | 12.6 (8.2-19.2)      |
| <b>hs CRP (mg/l)</b>             | 1.7 (0.8-4.1)             | 2.7 (1- 6)                      | 1.1 (0.6-2.9)        |
| <b>CAC Score</b>                 | 88 (0-401)                | 0 (0-79)                        | 7 (0- 143)           |
| <b>Medications (%)</b>           | <b>Caucasian (N= 867)</b> | <b>African American (N=483)</b> | <b>Other (N= 72)</b> |
| <b>Aspirin</b>                   | 46.5                      | 39.4                            | 31                   |
| <b>Statins</b>                   | 60.4                      | 48.4                            | 44.8                 |
| <b>Fibrates</b>                  | 9.4                       | 1.4                             | 5.1                  |
| <b>Niacin Derivatives</b>        | 7                         | 2.3                             | 5.1                  |
| <b>Ezetimibe</b>                 | 6.5                       | 2.9                             | 3.4                  |
| <b>Metformin</b>                 | 65.3                      | 58.9                            | 53.8                 |
| <b>Sulfonylureas</b>             | 35.1                      | 34.6                            | 37.9                 |
| <b>Thiazolidinediones (TZDs)</b> | 25                        | 18.1                            | 25.8                 |
| <b>Insulin</b>                   | 17.6                      | 29.3                            | 18.8                 |
| <b>Exenatide</b>                 | 4.4                       | 3.7                             | 2.6                  |
| <b>Sitagliptan</b>               | 5                         | 3                               | 3.4                  |

\*All quantitative values are given as median (IQR)

**Supplementary Table II: Association of ApoC-III with Lipid and Cardiometabolic Traits**

| Measure                    | All (N=1422) |                        | Women (N=597)      |                        | Men (N=825) |                        |
|----------------------------|--------------|------------------------|--------------------|------------------------|-------------|------------------------|
|                            | $\beta^*$    | P-value                | $\beta^*$          | P-value                | $\beta^*$   | P-value                |
| <b>Total Cholesterol</b>   | 0.4          | $P < 1 \times 10^{-4}$ | 0.34               | $P < 1 \times 10^{-4}$ | 0.45        | $P < 1 \times 10^{-4}$ |
| <b>TG**</b>                | 0.58         | $P < 1 \times 10^{-4}$ | 0.53               | $P < 1 \times 10^{-4}$ | 0.61        | $P < 1 \times 10^{-4}$ |
| <b>LDL-C</b>               | 0.14         | $P < 1 \times 10^{-4}$ | 0.16               | $P < 1 \times 10^{-4}$ | 0.12        | $P < 1 \times 10^{-4}$ |
| <b>HDL-C</b>               | 0.008        | $P = 0.71$             | 0.071              | $P = 0.08$             | -0.05       | $P = 0.12$             |
| <b>ApoA-I</b>              | -0.06        | $P < 0.01$             | -0.023             | $P = 0.57$             | -0.12       | $P < 1 \times 10^{-4}$ |
| <b>ApoA-II</b>             | 0.014        | $P = 0.58$             | 0.045              | $P = 0.27$             | -0.15       | $P = 0.63$             |
| <b>ApoB</b>                | 0.35         | $P < 1 \times 10^{-4}$ | 0.33               | $P < 1 \times 10^{-4}$ | 0.37        | $P < 1 \times 10^{-4}$ |
| <b>ApoE</b>                | 0.34         | $P < 1 \times 10^{-4}$ | 0.32               | $P < 1 \times 10^{-4}$ | 0.38        | $P < 1 \times 10^{-4}$ |
| <b>BMI</b>                 | 0.004        | $P = 0.85$             | 0.02               | $P = 0.50$             | 0.026       | $P = 0.37$             |
| <b>HbA1c</b>               | 0.14         | $P < 1 \times 10^{-4}$ | 0.04               | $P = 0.24$             | 0.23        | $P < 1 \times 10^{-4}$ |
| <b>Glucose</b>             | 0.11         | $P < 1 \times 10^{-4}$ | 0.03               | $P = 0.35$             | 0.2         | $P < 1 \times 10^{-4}$ |
| <b>Insulin</b>             | -0.011       | $P = 0.72$             | $1 \times 10^{-6}$ | $P = 0.99$             | -0.007      | $P = 0.87$             |
| <b>Leptin</b>              | -0.05        | $P = 0.14$             | -0.012             | $P = 0.76$             | -0.037      | $P = 0.30$             |
| <b>Waist Circumference</b> | 0.04         | $P = 0.07$             | 0.049              | $P = 0.16$             | 0.04        | $P = 0.16$             |

\* Linear regression model adjusted for age, gender, race, BMI, smoking, alcohol use, GFR, medications (statin, fibrates, niacin, ezetimibe, TZD, metformin, sulfonyleurea, insulin, exenatide, and sitagliptan). Beta coefficient indicates increment (positive or negative) in parameter per 1-standard deviation increase in ApoC-III levels.

\*\* Triglyceride levels were log-transformed since baseline values were not normally distributed

**Supplementary Table III: Association of ApoC-III with Glucose Traits Stratified by Plasma TG**

|                        | Covariates                                                   | TG < 150 mg/dl<br>(N=963) | TG > 150 mg/dl<br>(N=436)           |
|------------------------|--------------------------------------------------------------|---------------------------|-------------------------------------|
|                        |                                                              | $\beta$ (SE, P-value)     | $\beta$ (SE, P-value)               |
| <b>HbA1c</b>           | Unadjusted                                                   | 0.004<br>(0.005, 0.88)    | 0.25<br>(0.05, $1 \times 10^{-4}$ ) |
|                        | Age, Gender, Race                                            | 0.01<br>(0.005, 0.65)     | 0.25<br>(0.05, $1 \times 10^{-4}$ ) |
|                        | BMI, Alcohol use, smoking, GFR                               | 0.01<br>(0.005, 0.61)     | 0.24<br>(0.05, $1 \times 10^{-4}$ ) |
|                        | Insulin, oral hypoglycemic agents, statins, niacin, fibrates | 0.02<br>(0.004, 0.38)     | 0.23<br>(0.05, $1 \times 10^{-4}$ ) |
| <b>Fasting Glucose</b> | Unadjusted                                                   | -0.03<br>(0.16, 0.91)     | 0.18<br>(0.20, $1 \times 10^{-4}$ ) |
|                        | Age, Gender, Race                                            | 0.006<br>(0.16, 0.84)     | 0.18<br>(0.20, $1 \times 10^{-4}$ ) |
|                        | BMI, Alcohol use, smoking, GFR                               | 0.008<br>(0.16, 0.79)     | 0.17<br>(0.20, $1 \times 10^{-4}$ ) |
|                        | Insulin, oral hypoglycemic agents, statins, niacin, fibrates | 0.011<br>(0.15, 0.70)     | 0.17<br>(0.20, $1 \times 10^{-4}$ ) |

**Supplementary Table IV: ApoC-III Concentration Stratified by Presence vs. Absence of CAC**

| CAC Score Category | ApoC-III (mg/dl)<br>(mean $\pm$ SD) | OR=1.33<br>95% CI 1.05-1.69<br>P<0.05 |
|--------------------|-------------------------------------|---------------------------------------|
| CAC = 0 (N=519)    | 11.3 $\pm$ 5.5                      |                                       |
| CAC > 0 (N=899)    | 12.7 $\pm$ 5.8                      |                                       |
